# Supplementary material for: High mutual cooperation rates in rats learning reciprocal altruism: The role of payoff matrix
Source: PubMed Central journal article supplement (PMC6314613; doi:10.1371/journal.pone.0204837), 2019-01-02
Supplement: pone.0204837.s004.pdf [file pone.0204837.s004.pdf]

## TREATMENT 1

|         |   | OPPONENT |         |
|---------|---|----------|---------|
|         |   | C        | D       |
| SUBJECT | C | 1pellet  | 8second |
|         | D | 2pellet  | 4second |

## REWARD: rate of maximum food in the game

| Session | Rat 1 | Rat 2 | Rat 3 | Rat 4 | Rat 5 | Rat 6 | Rat 7 | Rat 8 | Rat 9 | Rat 10 | Rat 11 | Rat 12 |
|---------|-------|-------|-------|-------|-------|-------|-------|-------|-------|--------|--------|--------|
| 1       | 0.97  | 0.86  | 1.00  | 0.93  | 0.80  | 0.87  | 1.00  | 0.93  | 0.86  | 1.00   | 0.97   | 1.00   |
| 2       | 0.93  | 0.67  | 1.00  | 0.77  | 0.70  | 0.73  | 0.93  | 0.93  | 0.97  | 1.00   | 0.90   | 1.00   |
| 3       | 0.93  | 0.83  | 1.00  | 0.67  | 0.76  | 0.73  | 1.00  | 0.97  | 0.90  | 1.00   | 0.90   | 1.00   |
| 4       | 0.93  | 0.77  | 1.00  | 0.62  | 0.63  | 0.63  | 0.93  | 1.00  | 1.00  | 1.00   | 1.00   | 1.00   |
| 5       | 0.80  | 0.90  | 1.00  | 1.03  | 0.57  | 0.63  | 0.93  | 0.80  | 1.00  | 1.00   | 0.93   | 1.00   |
| 6       | 0.73  | 0.70  | 1.00  | 0.83  | 0.27  | 0.73  | 1.00  | 0.93  | 1.00  | 1.00   | 0.97   | 1.00   |
| 7       | 0.90  | 0.67  | 1.00  | 0.77  | 0.60  | 0.83  | 1.00  | 0.97  | 1.00  | 1.00   | 0.97   | 1.00   |
| 8       | 0.80  | 0.67  | 1.00  | 0.67  | 0.72  | 0.63  | 1.00  | 0.93  | 1.00  | 1.00   | 1.00   | 1.00   |
| 9       | 0.93  | 0.60  | 1.00  | 0.53  | 0.60  | 0.52  | 0.97  | 0.97  | 0.97  | 1.00   | 0.93   | 0.97   |
| 10      | 0.90  | 0.70  | 1.00  | 0.33  | 0.67  | 0.53  | 1.00  | 0.93  | 1.00  | 1.00   | 0.93   | 1.00   |

## TIMEOUT accumulated in a session (Punish + ITI)

| Session | Rat 1 | Rat 2 | Rat 3 | Rat 4 | Rat 5 | Rat 6 | Rat 7 | Rat 8 | Rat 9 | Rat 10 | Rat 11 | Rat 12 |
|---------|-------|-------|-------|-------|-------|-------|-------|-------|-------|--------|--------|--------|
| 1       | 210   | 237   | 150   | 226   | 254   | 222   | 166   | 190   | 200   | 150    | 186    | 150    |
| 2       | 206   | 234   | 150   | 238   | 238   | 258   | 198   | 202   | 194   | 158    | 210    | 174    |
| 3       | 190   | 241   | 150   | 230   | 241   | 230   | 174   | 198   | 196   | 150    | 210    | 158    |
| 4       | 206   | 230   | 150   | 245   | 250   | 250   | 206   | 178   | 166   | 150    | 166    | 166    |
| 5       | 214   | 246   | 150   | 190   | 262   | 242   | 198   | 210   | 158   | 150    | 226    | 150    |
| 6       | 254   | 254   | 150   | 238   | 262   | 258   | 150   | 194   | 158   | 150    | 222    | 150    |
| 7       | 206   | 258   | 150   | 234   | 254   | 258   | 166   | 178   | 174   | 150    | 230    | 150    |
| 8       | 222   | 250   | 158   | 250   | 229   | 254   | 174   | 216   | 174   | 150    | 191    | 158    |
| 9       | 206   | 250   | 150   | 266   | 238   | 258   | 162   | 186   | 186   | 150    | 214    | 171    |
| 10      | 202   | 262   | 150   | 262   | 242   | 258   | 150   | 206   | 190   | 150    | 218    | 150    |

## OCCUPANCY STATE rate per session of R (mutual cooperation)

| Sessions | 1    | 2    | 3    | 4    | 5    | 6    | 7    | 8    | 9    | 10   |
|----------|------|------|------|------|------|------|------|------|------|------|
| Rat 1    | 0.50 | 0.53 | 0.67 | 0.53 | 0.47 | 0.13 | 0.50 | 0.40 | 0.53 | 0.57 |
| Rat 2    | 0.23 | 0.27 | 0.20 | 0.30 | 0.17 | 0.10 | 0.07 | 0.13 | 0.13 | 0.03 |
| Rat 3    | 1.00 | 1.00 | 1.00 | 1.00 | 1.00 | 1.00 | 1.00 | 0.93 | 1.00 | 1.00 |
| Rat 4    | 0.33 | 0.23 | 0.33 | 0.21 | 0.63 | 0.23 | 0.30 | 0.13 | 0.00 | 0.07 |
| Rat 5    | 0.13 | 0.23 | 0.21 | 0.17 | 0.03 | 0.07 | 0.13 | 0.31 | 0.27 | 0.20 |
| Rat 6    | 0.40 | 0.07 | 0.33 | 0.17 | 0.23 | 0.07 | 0.10 | 0.10 | 0.10 | 0.07 |
| Rat 7    | 0.87 | 0.60 | 0.80 | 0.53 | 0.60 | 1.00 | 0.87 | 0.80 | 0.90 | 1.00 |
| Rat 8    | 0.67 | 0.53 | 0.57 | 0.73 | 0.47 | 0.60 | 0.77 | 0.45 | 0.70 | 0.53 |
| Rat 9    | 0.57 | 0.63 | 0.62 | 0.87 | 0.93 | 0.93 | 0.80 | 0.80 | 0.70 | 0.67 |
| Rat 10   | 0.93 | 1.00 | 1.00 | 1.00 | 1.00 | 1.00 | 1.00 | 1.00 | 1.00 | 1.00 |
| Rat 11   | 0.70 | 0.50 | 0.50 | 0.87 | 0.33 | 0.37 | 0.30 | 0.66 | 0.47 | 0.40 |
| Rat 12   | 1.00 | 0.80 | 0.93 | 0.87 | 1.00 | 1.00 | 1.00 | 0.93 | 0.83 | 1.00 |

## OCCUPANCY STATE rate per session of S (sucker state)

| Sessions | 1    | 2    | 3    | 4    | 5    | 6    | 7    | 8    | 9    | 10   |
|----------|------|------|------|------|------|------|------|------|------|------|
| Rat 1    | 0.23 | 0.20 | 0.13 | 0.20 | 0.17 | 0.30 | 0.17 | 0.20 | 0.20 | 0.17 |
| Rat 2    | 0.27 | 0.17 | 0.27 | 0.20 | 0.33 | 0.27 | 0.27 | 0.23 | 0.20 | 0.30 |
| Rat 3    | 0.00 | 0.00 | 0.00 | 0.00 | 0.00 | 0.00 | 0.00 | 0.00 | 0.00 | 0.03 |
| Rat 4    | 0.27 | 0.23 | 0.17 | 0.21 | 0.17 | 0.27 | 0.23 | 0.23 | 0.23 | 0.13 |
| Rat 5    | 0.33 | 0.20 | 0.24 | 0.23 | 0.23 | 0.10 | 0.23 | 0.17 | 0.17 | 0.20 |
| Rat 6    | 0.23 | 0.30 | 0.20 | 0.23 | 0.20 | 0.30 | 0.37 | 0.23 | 0.21 | 0.20 |
| Rat 7    | 0.03 | 0.07 | 0.17 | 0.10 | 0.20 | 0.17 | 0.00 | 0.07 | 0.10 | 0.03 |
| Rat 8    | 0.13 | 0.17 | 0.17 | 0.10 | 0.13 | 0.13 | 0.10 | 0.24 | 0.13 | 0.20 |
| Rat 9    | 0.13 | 0.17 | 0.14 | 0.07 | 0.03 | 0.03 | 0.10 | 0.10 | 0.13 | 0.17 |
| Rat 10   | 0.17 | 0.17 | 0.15 | 0.10 | 0.07 | 0.03 | 0.10 | 0.00 | 0.00 | 0.03 |
| Rat 11   | 0.13 | 0.20 | 0.20 | 0.07 | 0.27 | 0.27 | 0.30 | 0.17 | 0.23 | 0.23 |
| Rat 12   | 0.13 | 0.00 | 0.10 | 0.03 | 0.07 | 0.00 | 0.00 | 0.00 | 0.03 | 0.07 |

| OCCUPANCY STATE rate per session of T (temptation state) |      |      |      |      |      |      |      |      |      |      |
|----------------------------------------------------------|------|------|------|------|------|------|------|------|------|------|
| Sessions                                                 | 1    | 2    | 3    | 4    | 5    | 6    | 7    | 8    | 9    | 10   |
| Rat 1                                                    | 0.23 | 0.20 | 0.13 | 0.20 | 0.17 | 0.30 | 0.20 | 0.20 | 0.20 | 0.17 |
| Rat 2                                                    | 0.30 | 0.20 | 0.30 | 0.23 | 0.37 | 0.30 | 0.30 | 0.27 | 0.23 | 0.33 |
| Rat 3                                                    | 0.00 | 0.00 | 0.00 | 0.00 | 0.00 | 0.00 | 0.00 | 0.00 | 0.00 | 0.03 |
| Rat 4                                                    | 0.30 | 0.27 | 0.17 | 0.21 | 0.20 | 0.30 | 0.23 | 0.27 | 0.27 | 0.13 |
| Rat 5                                                    | 0.33 | 0.23 | 0.28 | 0.23 | 0.27 | 0.10 | 0.23 | 0.21 | 0.17 | 0.23 |
| Rat 6                                                    | 0.23 | 0.33 | 0.20 | 0.23 | 0.20 | 0.33 | 0.37 | 0.27 | 0.21 | 0.23 |
| Rat 7                                                    | 0.03 | 0.07 | 0.17 | 0.10 | 0.20 | 0.17 | 0.00 | 0.07 | 0.10 | 0.03 |
| Rat 8                                                    | 0.13 | 0.20 | 0.20 | 0.13 | 0.17 | 0.17 | 0.10 | 0.24 | 0.13 | 0.20 |
| Rat 9                                                    | 0.13 | 0.17 | 0.14 | 0.07 | 0.03 | 0.03 | 0.10 | 0.10 | 0.13 | 0.17 |
| Rat 10                                                   | 0.10 | 0.07 | 0.03 | 0.10 | 0.00 | 0.00 | 0.03 | 0.00 | 0.00 | 0.00 |
| Rat 11                                                   | 0.13 | 0.20 | 0.20 | 0.07 | 0.30 | 0.30 | 0.33 | 0.17 | 0.23 | 0.27 |
| Rat 12                                                   | 0.13 | 0.00 | 0.10 | 0.03 | 0.07 | 0.00 | 0.00 | 0.00 | 0.03 | 0.07 |

| OCCUPANCY STATE rate per session of P (Punishment state) |      |      |      |      |      |      |      |      |      |      |
|----------------------------------------------------------|------|------|------|------|------|------|------|------|------|------|
| Sessions                                                 | 1    | 2    | 3    | 4    | 5    | 6    | 7    | 8    | 9    | 10   |
| Rat 1                                                    | 0.23 | 0.20 | 0.13 | 0.20 | 0.17 | 0.30 | 0.20 | 0.20 | 0.20 | 0.17 |
| Rat 2                                                    | 0.30 | 0.20 | 0.30 | 0.23 | 0.37 | 0.30 | 0.30 | 0.27 | 0.23 | 0.33 |
| Rat 3                                                    | 0.00 | 0.00 | 0.00 | 0.00 | 0.00 | 0.00 | 0.00 | 0.03 | 0.00 | 0.00 |
| Rat 4                                                    | 0.30 | 0.27 | 0.17 | 0.21 | 0.20 | 0.30 | 0.23 | 0.27 | 0.27 | 0.13 |
| Rat 5                                                    | 0.33 | 0.23 | 0.28 | 0.23 | 0.27 | 0.10 | 0.23 | 0.21 | 0.17 | 0.23 |
| Rat 6                                                    | 0.23 | 0.33 | 0.20 | 0.23 | 0.20 | 0.33 | 0.37 | 0.27 | 0.21 | 0.23 |
| Rat 7                                                    | 0.03 | 0.07 | 0.17 | 0.10 | 0.20 | 0.17 | 0.00 | 0.07 | 0.10 | 0.03 |
| Rat 8                                                    | 0.07 | 0.10 | 0.07 | 0.03 | 0.23 | 0.10 | 0.03 | 0.07 | 0.03 | 0.07 |
| Rat 9                                                    | 0.13 | 0.17 | 0.14 | 0.07 | 0.03 | 0.03 | 0.10 | 0.10 | 0.13 | 0.17 |
| Rat 10                                                   | 0.15 | 0.10 | 0.07 | 0.03 | 0.10 | 0.00 | 0.00 | 0.03 | 0.00 | 0.00 |
| Rat 11                                                   | 0.13 | 0.20 | 0.20 | 0.07 | 0.30 | 0.30 | 0.33 | 0.17 | 0.23 | 0.27 |
| Rat 12                                                   | 0.13 | 0.00 | 0.10 | 0.03 | 0.07 | 0.00 | 0.00 | 0.00 | 0.03 | 0.07 |

## COOPERATION

| Number of COOPERATION option in a session |       |       |       |       |       |       |       |       |       |        |        |        |
|-------------------------------------------|-------|-------|-------|-------|-------|-------|-------|-------|-------|--------|--------|--------|
| Sessions                                  | Rat 1 | Rat 2 | Rat 3 | Rat 4 | Rat 5 | Rat 6 | Rat 7 | Rat 8 | Rat 9 | Rat 10 | Rat 11 | Rat 12 |
| 1                                         | 22    | 15    | 30    | 18    | 14    | 19    | 28    | 24    | 21    | 30     | 25     | 29     |
| 2                                         | 22    | 13    | 29    | 14    | 13    | 11    | 23    | 21    | 24    | 29     | 21     | 27     |
| 3                                         | 24    | 14    | 30    | 15    | 13    | 16    | 27    | 22    | 22    | 30     | 21     | 29     |
| 4                                         | 22    | 15    | 30    | 12    | 12    | 12    | 22    | 25    | 28    | 30     | 28     | 28     |
| 5                                         | 19    | 15    | 29    | 24    | 8     | 13    | 23    | 18    | 29    | 29     | 18     | 30     |
| 6                                         | 18    | 11    | 30    | 15    | 5     | 11    | 30    | 22    | 29    | 29     | 19     | 29     |
| 7                                         | 20    | 10    | 30    | 16    | 11    | 14    | 28    | 26    | 27    | 30     | 18     | 30     |
| 8                                         | 18    | 11    | 28    | 11    | 14    | 10    | 27    | 20    | 27    | 29     | 24     | 29     |
| 9                                         | 22    | 10    | 29    | 7     | 13    | 9     | 28    | 25    | 25    | 30     | 21     | 26     |
| 10                                        | 22    | 10    | 30    | 6     | 12    | 8     | 30    | 26    | 26    | 29     | 24     | 30     |

## Markov Chain Matrix for each rat

|              |      |      |      |      |
|--------------|------|------|------|------|
| <b>Rat 1</b> | T    | R    | P    | S    |
| T            | 0    | 0    | 0.47 | 0.53 |
| R            | 0.31 | 0.69 | 0    | 0    |
| P            | 0    | 0    | 0.36 | 0.64 |
| S            | 0.33 | 0.67 | 0    | 0    |

|              |      |      |      |      |
|--------------|------|------|------|------|
| <b>Rat 7</b> | T    | R    | P    | S    |
| T            | 0    | 0    | 0.22 | 0.78 |
| R            | 0.09 | 0.91 | 0    | 0    |
| P            | 0    | 0    | 0.2  | 0.8  |
| S            | 0.12 | 0.88 | 0    | 0    |

|              |      |      |      |      |
|--------------|------|------|------|------|
| <b>Rat 2</b> | T    | R    | P    | S    |
| T            | 0    | 0    | 0.53 | 0.47 |
| R            | 0.59 | 0.41 | 0    | 0    |
| P            | 0    | 0    | 0.55 | 0.45 |
| S            | 0.67 | 0.33 | 0    | 0    |

|              |      |      |      |      |
|--------------|------|------|------|------|
| <b>Rat 8</b> | T    | R    | P    | S    |
| T            | 0    | 0    | 0.36 | 0.64 |
| R            | 0.25 | 0.75 | 0    | 0    |
| P            | 0    | 0    | 0.32 | 0.68 |
| S            | 0.14 | 0.86 | 0    | 0    |

|              |   |   |   |   |
|--------------|---|---|---|---|
| <b>Rat 3</b> | T | R | P | S |
| T            | 0 | 0 | 0 | 1 |
| R            | 0 | 1 | 0 | 0 |
| P            | 0 | 0 | 0 | 0 |
| S            | 0 | 1 | 0 | 0 |

|              |      |      |      |      |
|--------------|------|------|------|------|
| <b>Rat 9</b> | T    | R    | P    | S    |
| T            | 0    | 0    | 0.22 | 0.78 |
| R            | 0.15 | 0.85 | 0    | 0    |
| P            | 0    | 0    | 0.22 | 0.78 |
| S            | 0    | 1    | 0    | 0    |

|              |      |      |      |      |
|--------------|------|------|------|------|
| <b>Rat 4</b> | T    | R    | P    | S    |
| T            | 0    | 0    | 0.5  | 0.5  |
| R            | 0.38 | 0.63 | 0    | 0    |
| P            | 0    | 0    | 0.65 | 0.35 |
| S            | 0.6  | 0.4  | 0    | 0    |

|               |   |   |   |   |
|---------------|---|---|---|---|
| <b>Rat 10</b> | T | R | P | S |
| T             | 0 | 0 | 0 | 0 |
| R             | 0 | 1 | 0 | 0 |
| P             | 0 | 0 | 0 | 0 |
| S             | 0 | 0 | 0 | 0 |

|              |      |      |      |      |
|--------------|------|------|------|------|
| <b>Rat 5</b> | T    | R    | P    | S    |
| T            | 0    | 0    | 0.65 | 0.35 |
| R            | 0.57 | 0.43 | 0    | 0    |
| P            | 0    | 0    | 0.65 | 0.35 |
| S            | 0.54 | 0.46 | 0    | 0    |

|               |      |      |      |      |
|---------------|------|------|------|------|
| <b>Rat 11</b> | T    | R    | P    | S    |
| T             | 0    | 0    | 0.26 | 0.74 |
| R             | 0.31 | 0.69 | 0    | 0    |
| P             | 0    | 0    | 0.16 | 0.84 |
| S             | 0.3  | 0.7  | 0    | 0    |

|              |      |      |      |      |
|--------------|------|------|------|------|
| <b>Rat 6</b> | T    | R    | P    | S    |
| T            | 0    | 0    | 0.51 | 0.49 |
| R            | 0.63 | 0.37 | 0    | 0    |
| P            | 0    | 0    | 0.62 | 0.38 |
| S            | 0.61 | 0.39 | 0    | 0    |

|               |      |      |      |      |
|---------------|------|------|------|------|
| <b>Rat 12</b> | T    | R    | P    | S    |
| T             | 0    | 0    | 0.11 | 0.89 |
| R             | 0.03 | 0.97 | 0    | 0    |
| P             | 0    | 0    | 0    | 1    |
| S             | 0    | 1    | 0    | 0    |

Treatment 2

TREATMENT 2 (A and B)

OPPONENT

| Matrix  |   | C       |         | D       |         |
|---------|---|---------|---------|---------|---------|
|         |   | 1pellet | 8second | 3pellet | 4second |
| SUBJECT | C | 1pellet | 8second |         |         |
|         | D | 3pellet | 4second |         |         |

OCCUPANCY STATE rate per session of R (mutual cooperation)

| Sessions | 1    | 2    | 3    | 4    | 5    |
|----------|------|------|------|------|------|
| Rat 1    | 0.80 | 0.93 | 0.70 | 0.83 | 0.70 |
| Rat 2    | 0.13 | 0.47 | 0.20 | 0.10 | 0.28 |
| Rat 3    | 0.80 | 0.63 | 0.87 | 0.73 | 0.77 |
| Rat 4    | 0.93 | 0.73 | 0.67 | 0.90 | 1.00 |
| Rat 5    | 0.27 | 0.23 | 0.53 | 0.21 | 0.27 |
| Rat 6    | 0.40 | 0.47 | 0.53 | 0.53 | 0.53 |

OCCUPANCY STATE rate per session of S (sucker state)

| Sessions | 1    | 2    | 3    | 4    | 5    |
|----------|------|------|------|------|------|
| Rat 1    | 0.07 | 0.03 | 0.13 | 0.07 | 0.13 |
| Rat 2    | 0.37 | 0.13 | 0.33 | 0.28 | 0.24 |
| Rat 3    | 0.07 | 0.17 | 0.07 | 0.10 | 0.10 |
| Rat 4    | 0.03 | 0.10 | 0.13 | 0.03 | 0.00 |
| Rat 5    | 0.17 | 0.23 | 0.23 | 0.28 | 0.20 |
| Rat 6    | 0.20 | 0.17 | 0.17 | 0.17 | 0.13 |

OCCUPANCY STATE rate per session of T (temptation state)

| Sessions | 1    | 2    | 3    | 4    | 5    |
|----------|------|------|------|------|------|
| Rat 1    | 0.07 | 0.03 | 0.13 | 0.07 | 0.13 |
| Rat 2    | 0.37 | 0.17 | 0.33 | 0.31 | 0.28 |
| Rat 3    | 0.10 | 0.17 | 0.07 | 0.10 | 0.10 |
| Rat 4    | 0.03 | 0.10 | 0.13 | 0.03 | 0.00 |
| Rat 5    | 0.17 | 0.27 | 0.23 | 0.28 | 0.23 |
| Rat 6    | 0.20 | 0.17 | 0.17 | 0.17 | 0.17 |

OCCUPANCY STATE rate per session of P (Punishment state)

| Sessions | 1    | 2    | 3    | 4    | 5    |
|----------|------|------|------|------|------|
| Rat 1    | 0.07 | 0.00 | 0.03 | 0.03 | 0.03 |
| Rat 2    | 0.13 | 0.23 | 0.13 | 0.31 | 0.21 |
| Rat 3    | 0.03 | 0.03 | 0.00 | 0.07 | 0.03 |
| Rat 4    | 0.00 | 0.07 | 0.07 | 0.03 | 0.00 |
| Rat 5    | 0.40 | 0.27 | 0.00 | 0.24 | 0.30 |
| Rat 6    | 0.20 | 0.20 | 0.13 | 0.13 | 0.17 |

Number of COOPERATION option in a session

| Sessions | Rat 1 | Rat 2 | Rat 3 | Rat 4 | Rat 5 | Rat 6 |
|----------|-------|-------|-------|-------|-------|-------|
| 1        | 26    | 15    | 26    | 29    | 13    | 18    |
| 2        | 28    | 18    | 24    | 25    | 14    | 19    |
| 3        | 25    | 16    | 28    | 24    | 23    | 21    |
| 4        | 26    | 11    | 25    | 28    | 14    | 21    |
| 5        | 25    | 15    | 26    | 30    | 14    | 20    |

Markov Chain Matrix for each rat

| Rat 1 | T    | R    | P    | S    |
|-------|------|------|------|------|
| T     | 0.00 | 0.00 | 0.38 | 0.62 |
| R     | 0.10 | 0.90 | 0.00 | 0.00 |
| P     | 0.00 | 0.00 | 0.00 | 1.00 |
| S     | 0.17 | 0.83 | 0.00 | 0.00 |

| Rat 2 | T    | R    | P    | S    |
|-------|------|------|------|------|
| T     | 0.00 | 0.00 | 0.40 | 0.60 |
| R     | 0.54 | 0.46 | 0.00 | 0.00 |
| P     | 0.00 | 0.00 | 0.48 | 0.52 |
| S     | 0.55 | 0.45 | 0.00 | 0.00 |

Treatment 2

| <b>Rat 3</b> | <b>T</b> | <b>R</b> | <b>P</b> | <b>S</b> |
|--------------|----------|----------|----------|----------|
| <b>T</b>     | 0.00     | 0.00     | 0.33     | 0.67     |
| <b>R</b>     | 0.15     | 0.85     | 0.00     | 0.00     |
| <b>P</b>     | 0.00     | 0.00     | 0.00     | 1.00     |
| <b>S</b>     | 0.00     | 1.00     | 0.00     | 0.00     |

| <b>Rat 4</b> | <b>T</b> | <b>R</b> | <b>P</b> | <b>S</b> |
|--------------|----------|----------|----------|----------|
| <b>T</b>     | 0.00     | 0.00     | 0.33     | 0.67     |
| <b>R</b>     | 0.07     | 0.93     | 0.00     | 0.00     |
| <b>P</b>     | 0.00     | 0.00     | 0.40     | 0.60     |
| <b>S</b>     | 0.00     | 1.00     | 0.00     | 0.00     |

| <b>Rat 5</b> | <b>T</b> | <b>R</b> | <b>P</b> | <b>S</b> |
|--------------|----------|----------|----------|----------|
| <b>T</b>     | 0.00     | 0.00     | 0.44     | 0.56     |
| <b>R</b>     | 0.48     | 0.52     | 0.00     | 0.00     |
| <b>P</b>     | 0.00     | 0.00     | 0.60     | 0.40     |
| <b>S</b>     | 0.42     | 0.58     | 0.00     | 0.00     |

| <b>Rat 6</b> | <b>T</b> | <b>R</b> | <b>P</b> | <b>S</b> |
|--------------|----------|----------|----------|----------|
| <b>T</b>     | 0.00     | 0.00     | 0.76     | 0.24     |
| <b>R</b>     | 0.33     | 0.67     | 0.00     | 0.00     |
| <b>P</b>     | 0.00     | 0.00     | 0.24     | 0.76     |
| <b>S</b>     | 0.08     | 0.92     | 0.00     | 0.00     |

**REWARD: rate of maximum food in the game**

| Sessions | <b>Rat 1</b> | <b>Rat 2</b> | <b>Rat 3</b> | <b>Rat 4</b> | <b>Rat 5</b> | <b>Rat 6</b> |
|----------|--------------|--------------|--------------|--------------|--------------|--------------|
| <b>1</b> | 0.67         | 0.82         | 0.73         | 0.69         | 0.51         | 0.67         |
| <b>2</b> | 0.69         | 0.64         | 0.76         | 0.69         | 0.69         | 0.64         |
| <b>3</b> | 0.73         | 0.80         | 0.71         | 0.71         | 0.82         | 0.69         |
| <b>4</b> | 0.69         | 0.69         | 0.69         | 0.67         | 0.69         | 0.69         |
| <b>5</b> | 0.73         | 0.74         | 0.71         | 0.67         | 0.64         | 0.69         |

**TIMEOUT accumulated in a session (Punish + ITI)**

| Sessions | <b>Rat 1</b> | <b>Rat 2</b> | <b>Rat 3</b> | <b>Rat 4</b> | <b>Rat 5</b> | <b>Rat 6</b> |
|----------|--------------|--------------|--------------|--------------|--------------|--------------|
| <b>1</b> | 0.20         | 0.87         | 0.17         | 0.07         | 0.73         | 0.60         |
| <b>2</b> | 0.07         | 0.50         | 0.37         | 0.27         | 0.73         | 0.53         |
| <b>3</b> | 0.30         | 0.80         | 0.13         | 0.33         | 0.47         | 0.47         |
| <b>4</b> | 0.17         | 0.86         | 0.27         | 0.10         | 0.79         | 0.47         |
| <b>5</b> | 0.30         | 0.69         | 0.23         | 0.00         | 0.70         | 0.43         |

Treatment 3A (effect of reward change)

TREATMENT 3 (A)

OPPONENT

|         |   | Matrix  |         |
|---------|---|---------|---------|
|         |   | C       | D       |
| SUBJECT | C | 1pellet | 8second |
|         | D | 5pellet | 4second |

OCCUPANCY STATE rate per session of R (mutual cooperation)

| Sessions | 1    | 2    | 3    | 4    | 5    |
|----------|------|------|------|------|------|
| Rat 1    | 0.37 | 0.13 | 0.10 | 0.10 | 0.37 |
| Rat 2    | 0.76 | 0.70 | 0.68 | 0.53 | 0.70 |
| Rat 3    | 0.53 | 0.27 | 0.37 | 0.43 | 0.53 |

OCCUPANCY STATE rate per session of S (sucker state)

| Sessions | 1    | 2    | 3    | 4    | 5    |
|----------|------|------|------|------|------|
| Rat 1    | 0.23 | 0.27 | 0.13 | 0.30 | 0.13 |
| Rat 2    | 0.10 | 0.10 | 0.14 | 0.17 | 0.10 |
| Rat 3    | 0.13 | 0.17 | 0.23 | 0.17 | 0.20 |

OCCUPANCY STATE rate per session of T (temptation state)

| Sessions | 1    | 2    | 3    | 4    | 5    |
|----------|------|------|------|------|------|
| Rat 1    | 0.23 | 0.27 | 0.17 | 0.30 | 0.17 |
| Rat 2    | 0.10 | 0.13 | 0.14 | 0.20 | 0.13 |
| Rat 3    | 0.13 | 0.17 | 0.23 | 0.17 | 0.20 |

OCCUPANCY STATE rate per session of P (Punishment state)

| Sessions | 1    | 2    | 3    | 4    | 5    |
|----------|------|------|------|------|------|
| Rat 1    | 0.17 | 0.33 | 0.60 | 0.30 | 0.33 |
| Rat 2    | 0.03 | 0.07 | 0.04 | 0.10 | 0.07 |
| Rat 3    | 0.20 | 0.40 | 0.17 | 0.23 | 0.07 |

Number of COOPERATION option in a session

| Sessions | Rat 1 | Rat 2 | Rat 3 |
|----------|-------|-------|-------|
| 1        | 18    | 25    | 20    |
| 2        | 12    | 24    | 13    |
| 3        | 7     | 23    | 18    |
| 4        | 12    | 21    | 18    |
| 5        | 15    | 24    | 22    |

Markov Chain Matrix for each rat

| Rat 1 | T    | R    | P    | S    |
|-------|------|------|------|------|
| T     | 0.00 | 0.00 | 0.61 | 0.39 |
| R     | 0.56 | 0.44 | 0.00 | 0.00 |
| P     | 0.00 | 0.00 | 0.56 | 0.44 |
| S     | 0.45 | 0.55 | 0.00 | 0.00 |

| Rat 2 | T    | R    | P    | S    |
|-------|------|------|------|------|
| T     | 0.00 | 0.00 | 0.47 | 0.53 |
| R     | 0.21 | 0.79 | 0.00 | 0.00 |
| P     | 0.00 | 0.00 | 0.00 | 1.00 |
| S     | 0.00 | 1.00 | 0.00 | 0.00 |

| Rat 3 | T    | R    | P    | S    |
|-------|------|------|------|------|
| T     | 0.00 | 0.00 | 0.58 | 0.42 |
| R     | 0.37 | 0.63 | 0.00 | 0.00 |
| P     | 0.00 | 0.00 | 0.42 | 0.58 |
| S     | 0.16 | 0.84 | 0.00 | 0.00 |

REWARD: rate of maximum food in the game

| Sessions | Rat 1 | Rat 2 | Rat 3 |
|----------|-------|-------|-------|
| 1        | 0.61  | 0.51  | 0.48  |
| 2        | 0.59  | 0.55  | 0.44  |
| 3        | 0.37  | 0.56  | 0.61  |
| 4        | 0.64  | 0.61  | 0.51  |
| 5        | 0.48  | 0.55  | 0.61  |

TIMEOUT: ratio of maximum timeout in a session

| Sessions | Rat 1 | Rat 2 | Rat 3 |
|----------|-------|-------|-------|
| 1        | 0.63  | 0.24  | 0.47  |
| 2        | 0.87  | 0.27  | 0.73  |
| 3        | 0.87  | 0.32  | 0.63  |
| 4        | 0.90  | 0.43  | 0.57  |
| 5        | 0.60  | 0.27  | 0.47  |

Treatment 3\_B (effect of reward change)

EXPERIMENTE 3 (B)

OPPONENT

| Matrix  |   | C       |         | D |  |
|---------|---|---------|---------|---|--|
|         |   | C       |         | D |  |
| SUBJECT | C | 2pellet | 8second |   |  |
|         | D | 3pellet | 4second |   |  |

OCCUPANCY STATE rate per session of R (mutual cooperation)

| Sessions | 1    | 2    | 3    | 4    | 5    |
|----------|------|------|------|------|------|
| Rat 1    | 0.43 | 0.33 | 0.50 | 0.47 | 0.40 |
| Rat 2    | 0.37 | 0.07 | 0.27 | 0.27 | 0.30 |
| Rat 3    | 0.50 | 0.53 | 0.63 | 0.73 | 0.55 |

OCCUPANCY STATE rate per session of S (sucker state)

| Sessions | 1    | 2    | 3    | 4    | 5    |
|----------|------|------|------|------|------|
| Rat 1    | 0.23 | 0.30 | 0.20 | 0.23 | 0.23 |
| Rat 2    | 0.23 | 0.33 | 0.23 | 0.20 | 0.23 |
| Rat 3    | 0.17 | 0.20 | 0.13 | 0.13 | 0.17 |

OCCUPANCY STATE rate per session of T (temptation state)

| Sessions | 1    | 2    | 3    | 4    | 5    |
|----------|------|------|------|------|------|
| Rat 1    | 0.27 | 0.30 | 0.20 | 0.23 | 0.23 |
| Rat 2    | 0.27 | 0.33 | 0.27 | 0.20 | 0.27 |
| Rat 3    | 0.17 | 0.20 | 0.13 | 0.13 | 0.17 |

OCCUPANCY STATE rate per session of P (Punishment state)

| Sessions | 1    | 2    | 3    | 4    | 5    |
|----------|------|------|------|------|------|
| Rat 1    | 0.07 | 0.07 | 0.10 | 0.07 | 0.13 |
| Rat 2    | 0.13 | 0.27 | 0.23 | 0.33 | 0.20 |
| Rat 3    | 0.13 | 0.07 | 0.10 | 0.00 | 0.10 |

Number of COOPERATION option in a session

| Sessions | Rat 1 | Rat 2 | Rat 3 |
|----------|-------|-------|-------|
| 1        | 20    | 18    | 20    |
| 2        | 19    | 12    | 22    |
| 3        | 21    | 15    | 23    |
| 4        | 21    | 14    | 26    |
| 5        | 19    | 16    | 21    |

Markov Chain Matrix for each rat

| Rat 1 | T    | R    | P    | S    |
|-------|------|------|------|------|
| T     | 0.00 | 0.00 | 0.22 | 0.78 |
| R     | 0.44 | 0.56 | 0.00 | 0.00 |
| P     | 0.00 | 0.00 | 0.33 | 0.67 |
| S     | 0.26 | 0.74 | 0.00 | 0.00 |

| Rat 2 | T    | R    | P    | S    |
|-------|------|------|------|------|
| T     | 0.00 | 0.00 | 0.47 | 0.53 |
| R     | 0.37 | 0.63 | 0.00 | 0.00 |
| P     | 0.00 | 0.00 | 0.49 | 0.51 |
| S     | 0.65 | 0.35 | 0.00 | 0.00 |

| Rat 3 | T    | R    | P    | S    |
|-------|------|------|------|------|
| T     | 0.00 | 0.00 | 0.45 | 0.55 |
| R     | 0.25 | 0.75 | 0.00 | 0.00 |
| P     | 0.00 | 0.00 | 0.08 | 0.92 |
| S     | 0.08 | 0.92 | 0.00 | 0.00 |

REWARD: rate of maximum food in the game

| Sessions | Rat 1 | Rat 2 | Rat 3 |
|----------|-------|-------|-------|
| 1        | 0.83  | 0.77  | 0.75  |
| 2        | 0.78  | 0.57  | 0.83  |
| 3        | 0.80  | 0.67  | 0.83  |
| 4        | 0.82  | 0.57  | 0.93  |
| 5        | 0.75  | 0.70  | 0.81  |

TIMEOUT accumulated in a session (Punish + ITI)

| Sessions | Rat 1 | Rat 2 | Rat 3 |
|----------|-------|-------|-------|
| 1        | 0.53  | 0.60  | 0.43  |
| 2        | 0.67  | 0.93  | 0.47  |
| 3        | 0.50  | 0.70  | 0.37  |
| 4        | 0.53  | 0.73  | 0.27  |
| 5        | 0.60  | 0.67  | 0.45  |

## EXPERIMENTE 1 – REVERSION

OPPONENT

| Matrix  |   | OPPONENT |         |
|---------|---|----------|---------|
|         |   | C        | D       |
| SUBJECT | C | 1pellet  | 8second |
|         | D | 2pellet  | 4second |

## Number of COOPERATION option in a session

| Sessions | Rat 1 | Rat 2 | Rat 3 | Rat 4 |
|----------|-------|-------|-------|-------|
| 1        | 0.63  | 0.90  | 0.83  | 0.76  |
| 2        | 0.70  | 0.90  | 0.93  | 1.00  |
| 3        | 0.90  | 0.93  | 1.00  | 1.00  |
| 4        | 0.83  | 0.86  | 0.83  | 1.00  |
| 5        | 0.87  | 0.80  | 0.69  | 1.00  |
| 6        | 0.80  | 0.93  | 0.90  | 1.00  |
| 7        | 0.80  | 0.83  | 0.77  | 0.97  |
| 8        | 0.73  | 0.72  | 0.80  | 1.00  |
| 9        | 0.83  | 0.86  | 0.83  | 1.00  |
| 10       | 0.83  | 0.97  | 0.86  | 1.00  |

## REWARD: rate of maximum food in the game

| Sessions | Rat 1 | Rat 2 | Rat 3 | Rat 4 |
|----------|-------|-------|-------|-------|
| 1        | 0.90  | 1.00  | 0.97  | 0.73  |
| 2        | 0.93  | 1.00  | 1.00  | 1.00  |
| 3        | 1.00  | 1.00  | 1.00  | 1.00  |
| 4        | 0.97  | 0.97  | 0.93  | 1.00  |
| 5        | 1.03  | 0.97  | 0.93  | 1.00  |
| 6        | 1.00  | 1.00  | 0.97  | 1.00  |
| 7        | 1.03  | 0.97  | 0.93  | 1.00  |
| 8        | 0.97  | 0.97  | 0.97  | 1.00  |
| 9        | 0.97  | 1.00  | 0.97  | 1.00  |
| 10       | 1.00  | 1.00  | 1.00  | 1.00  |
